# Supplementary material for: SERPINE1 rs6092 Variant Is Related to Plasma Coagulation Proteins in Patients with Severe COVID-19 from a Tertiary Care Hospital
Source: MDPI journal article supplement (doi:10.3390/biology11040595), 2022-04-14
Supplement: s1 [file s1]

## Supplementary Material

**Table S1. Logistic regression analysis of *SERPINE1* rs6092 including co-variables in IMV vs Non-IMV groups.**

| TEST                                                   | <i>p</i> -value | OR       | 95% CI      |
|--------------------------------------------------------|-----------------|----------|-------------|
| rs6092 additive effect model                           | 0.9994          | 1.40E+04 | 0           |
| Covar 1: Leukocytes                                    | 8.82E-09        | 1.235    | 1.149-1.327 |
| Covar 2: Platelets                                     | 0.0104          | 0.998    | 0.996-0.999 |
| 2df test of the SNV whilst controlling for covariables | 0.7864          | NA       | NA          |

IMV: invasive mechanical ventilation; NA: does not apply; SNV: Single nucleotide variant; OR: Odds ratio; 95% CI: 95% Confidence interval.

**Table S2. Evaluation of differences in coagulation proteins' levels according to the gender of patients**

| Protein (pg/mL) | Female (n=51)          | Male (n=80)            | <i>p</i> -value* |
|-----------------|------------------------|------------------------|------------------|
| P-Selectin      | 510 [253-843]          | 418 [255-1,037]        | 0.8006           |
| D-dimer         | 534 [335-860]          | 471 [263-1,135]        | 0.9135           |
| PSGL-1          | 5,944 [4,559-7,122]    | 5,944 [4,999-7,034]    | 0.5807           |
| tPA             | 2,000 [1,285-3,178]    | 2,186 [1,469-3,423]    | 0.5872           |
| PAI-1           | 77,879 [73,811-85,457] | 80,600 [73,166-87,347] | 0.7860           |
| Factor IX       | 17,635 [13,863-23,148] | 16,961 [14,287-20,742] | 0.3660           |

Proteins' levels are presented as median [interquartile range]. \*Mann-Whitney U Test. Statistically significant values are presented in bold style. PAI-1, plasminogen activator inhibitor-1; PSGL-1, P-selectin glycoprotein ligand-1; tPA, tissue plasminogen activator.

## Supplementary Figures

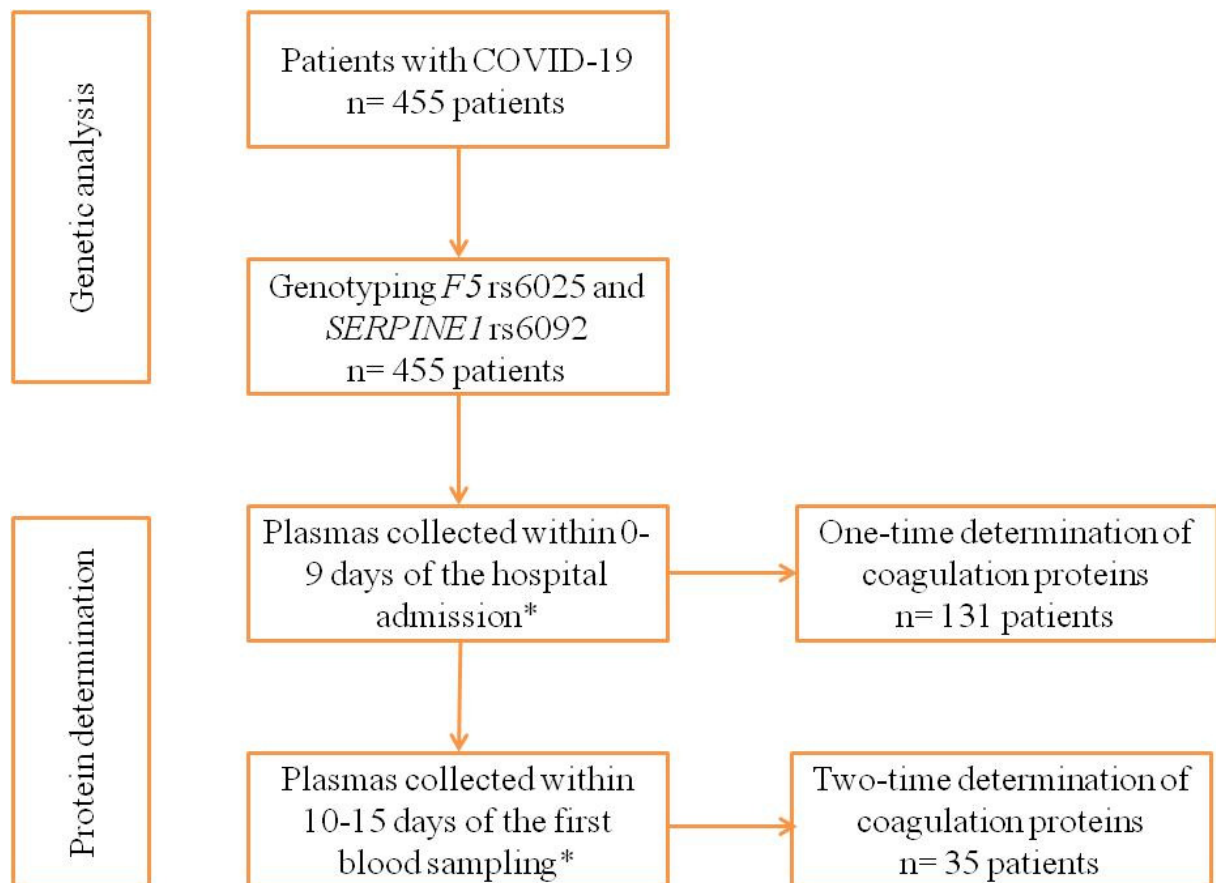

**Figure S1.** Selection of patients for the coagulation proteins determination.

\*The genotype of *F5* rs6025 and *SERPINE1* rs6092 was also considered.

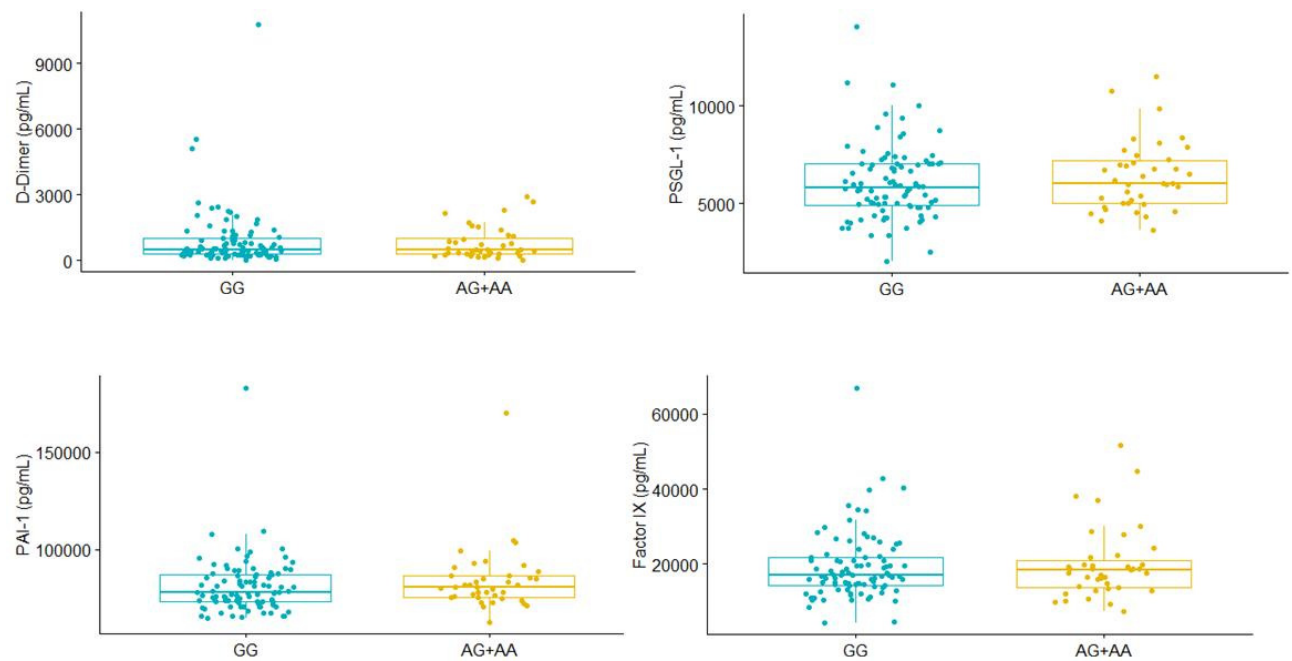

**Figure S2.** Levels of coagulation proteins (pg/mL) according to *SERPINE1* rs6092 genotype (n=131). Mann Whitney U test,  $p>0.05$  in all cases.

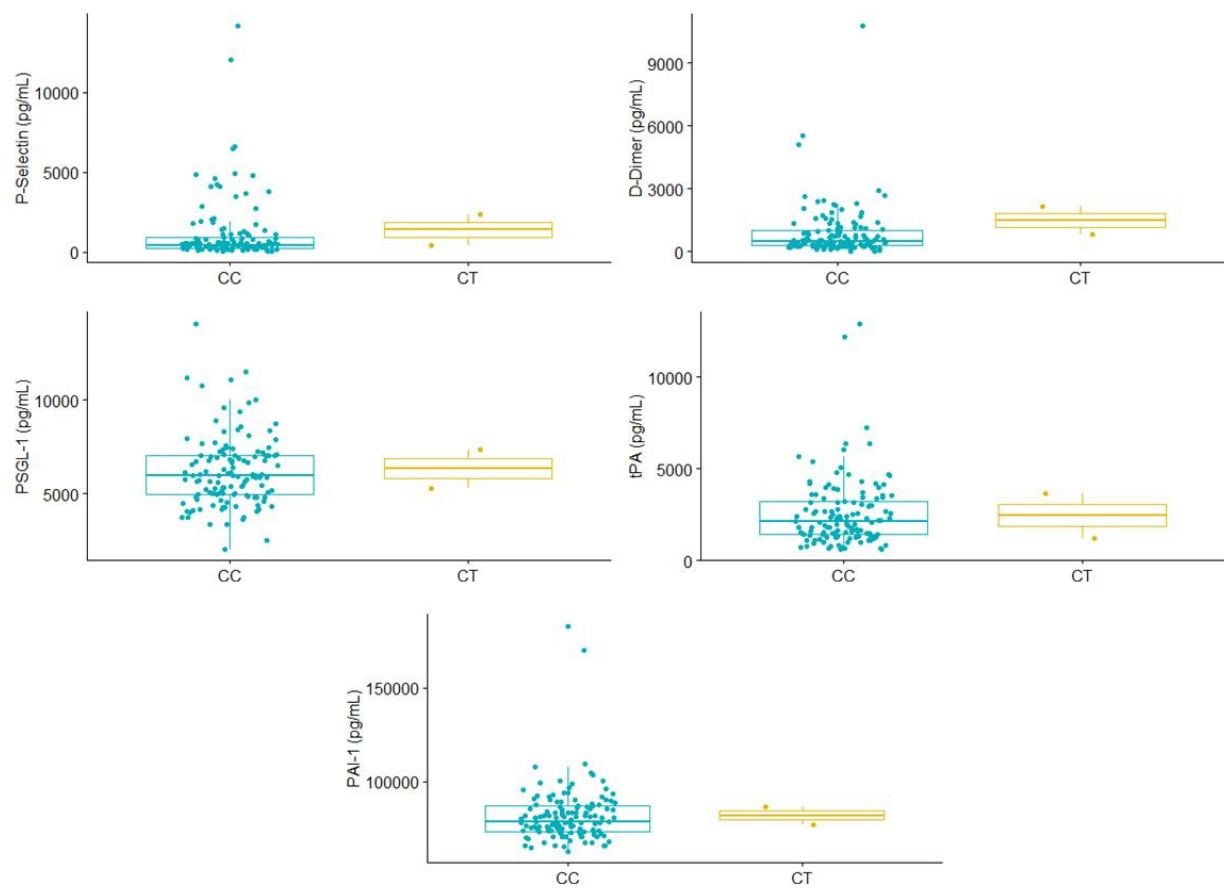

**Figure S3.** Levels of coagulation proteins (pg/mL) according to *F5* rs6025 genotype (n=131). Mann Whitney U test,  $p>0.05$  in all cases.

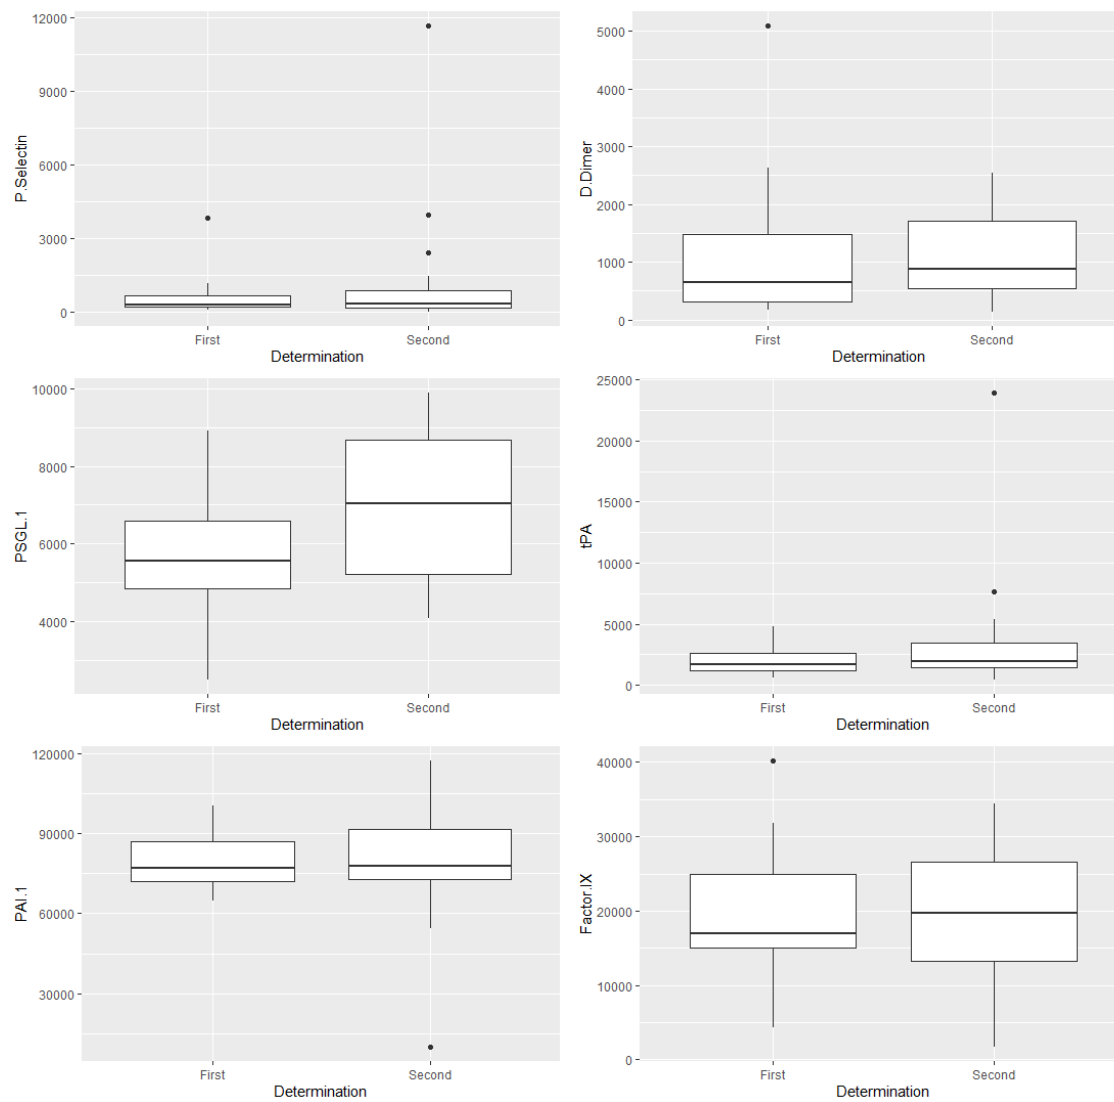

**Figure S4.** Levels of coagulation proteins (pg/mL) in two determinations for patients with *SERPINE1* rs6092 GG genotype (n=22). Wilcoxon test,  $p > 0.05$  in all cases.

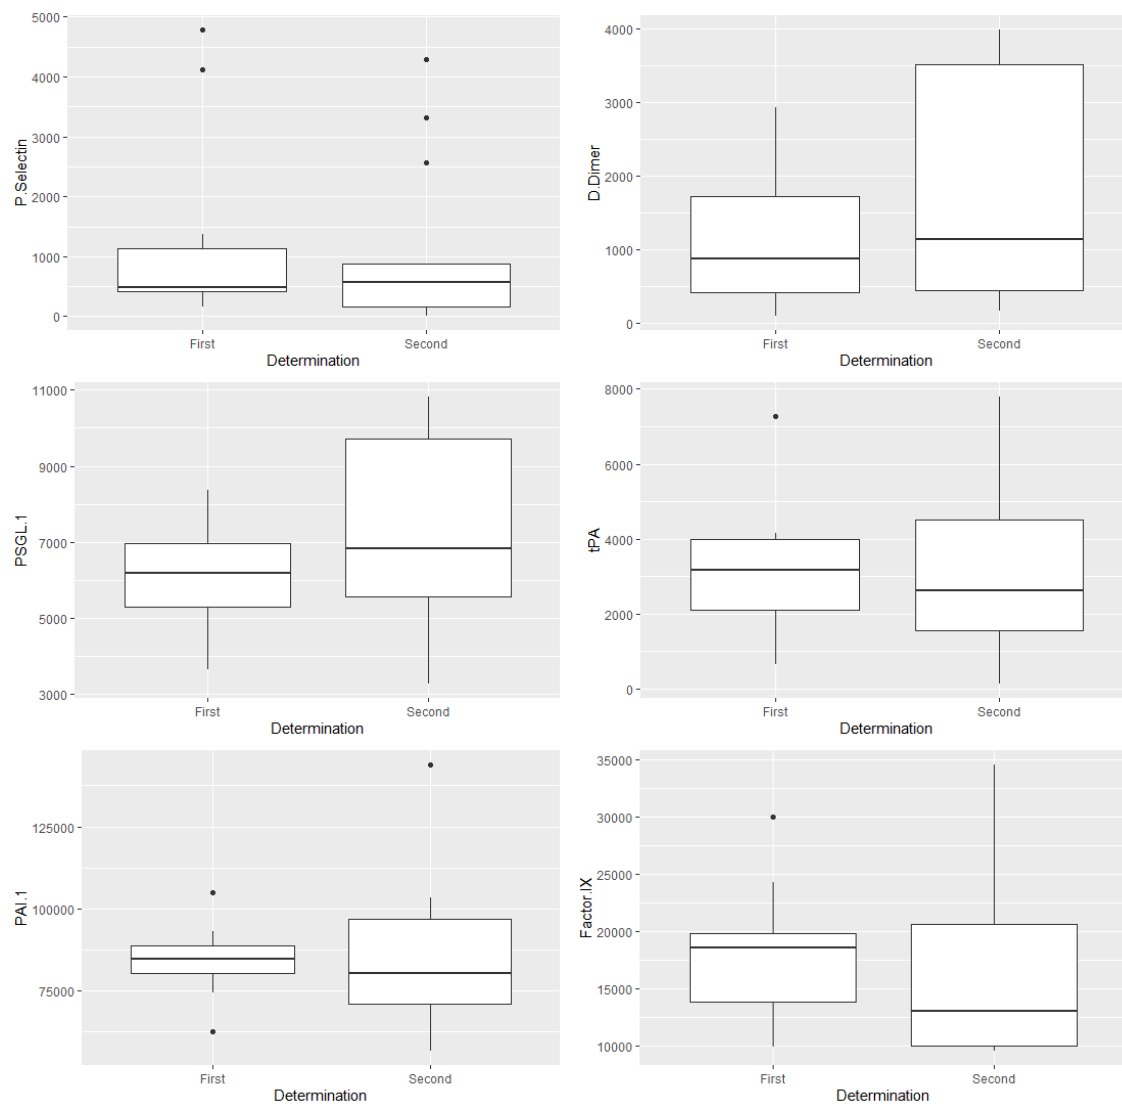

**Figure S5.** Levels of coagulation proteins (pg/mL) in two determinations for patients with *SERPINE1* rs6092 AG+AA genotype (n=13). Wilcoxon test  $p > 0.05$  in all cases.

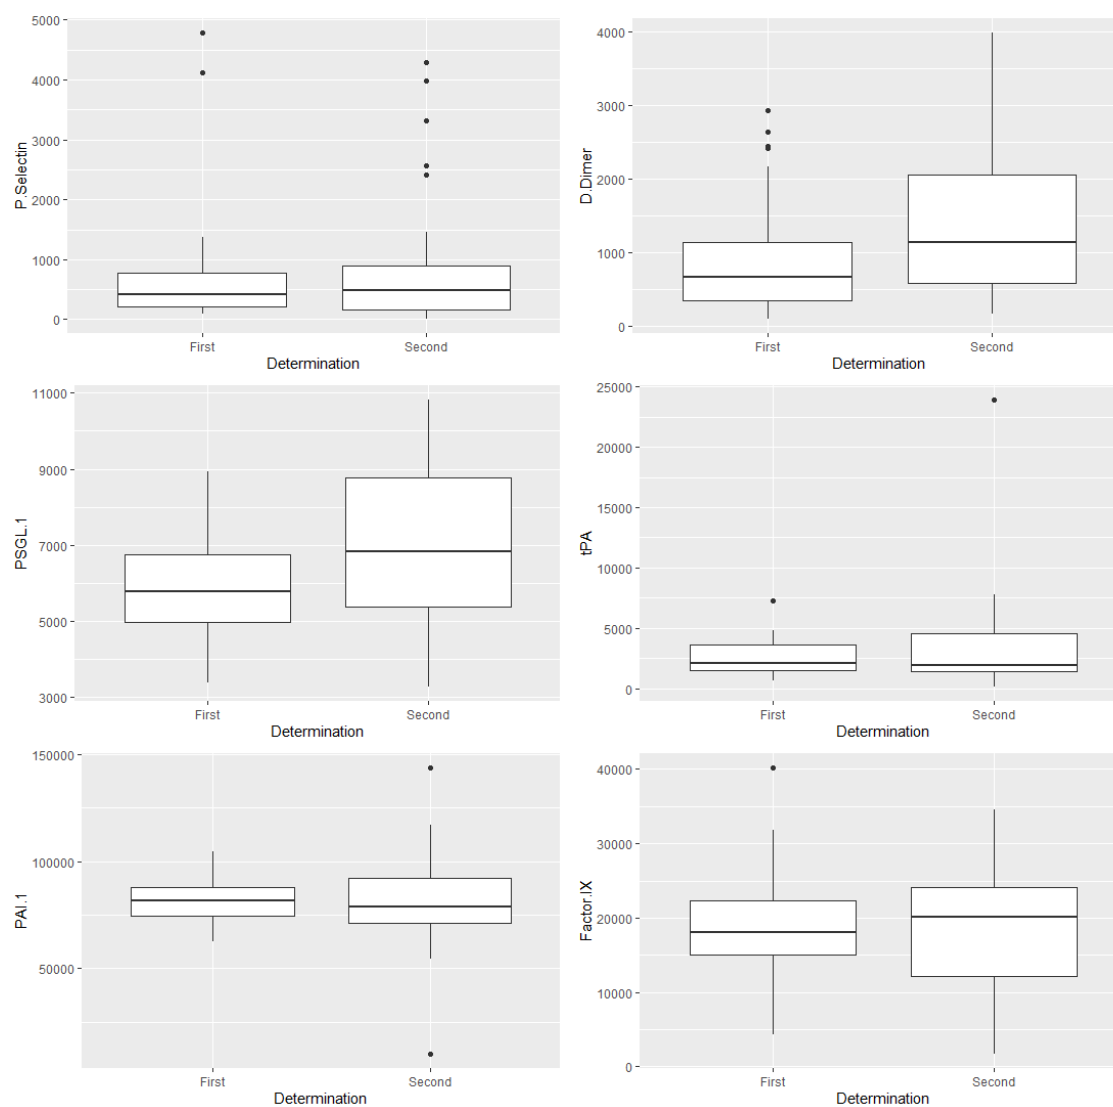

**Figure S6.** Levels of coagulation proteins (pg/mL) in two determinations for patients requiring invasive mechanical ventilation (IMV, n=29). Wilcoxon test,  $p > 0.05$  in all cases.

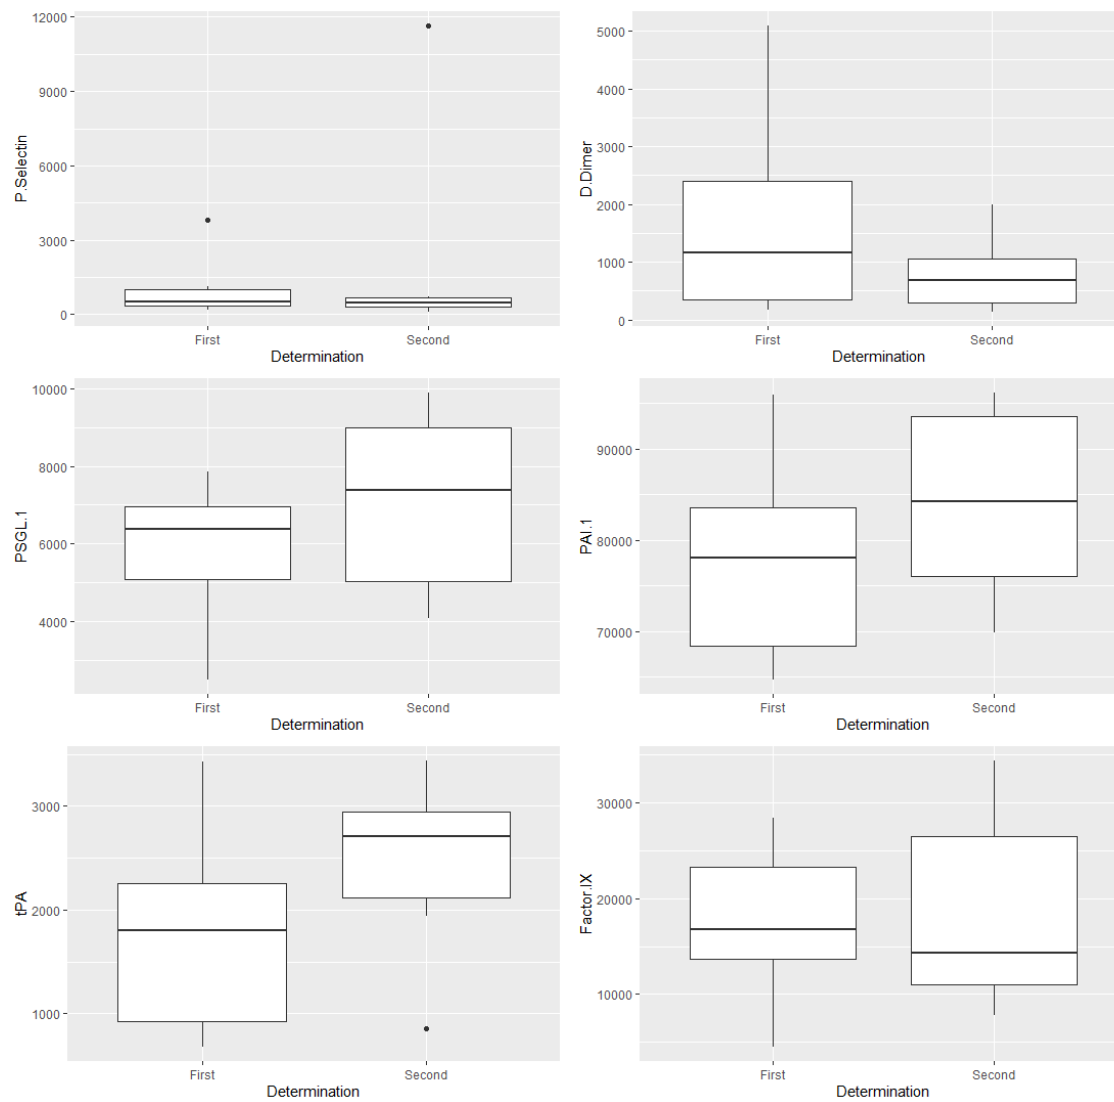

**Figure S7.** Levels of coagulation proteins (pg/mL) in two determinations for patients who did not require invasive mechanical ventilation (Non-IMV, n=3). Wilcoxon test,  $p > 0.05$  in all cases.
